# Supplementary material for: Biases during DNA extraction affect characterization of the microbiota associated with larvae of the Pacific white shrimp, Litopenaeus vannamei
Source: PeerJ. 2018 Jul 16;6:e5257. doi: 10.7717/peerj.5257 (PMC6052851; doi:10.7717/peerj.5257)
Supplement: Supplemental Information 2 — Means with different superscripts in the same row are significantly different (P < 0.05, n = 3). [file peerj-06-5257-s002.docx]

| Phylum / Class | Family | Kits | | | |
| --- | --- | --- | --- | --- | --- |
| Ba | Mo | St | Ti |
| α-Proteobacteria | Rhodobacteraceae | 48.49±0.72 a | 46.35±3.95 a | 15.97±2.46 c | 31.25±2.46 b |
| β-Proteobacteria | Comamonadaceae | 0.50±0.03 bc | 1.34±0.41 b | 0.18±0.01 c | 26.98±3.87 a |
| Oxalobacteraceae | 0.09±0.06 b | 0.22±0.31 b | 1.13±0.11 a | 0.47±0.35 b |
| γ-Proteobacteria | Alteromonadaceae | 1.90±0.180 a | 1.64±0.08 ab | 0.66±0.09 c | 1.35±0.32 b |
| Enterobacteriaceae | 0.29±0.08 b | 0.34±0.08 b | 2.83±0.24 a | 0.25±0.13 b |
| Moraxellaceae | 2.28±0.22 b | 4.21±2.17 ab | 12.46±0.63 a | 9.03±7.51 ab |
| OTU_19 (Unclassified) | 1.11±0.16 a | 0.94±0.29 a | 0.35±0.11 b | 0.09±0.08 c |
| Firmicutes | Bacillaceae | 1.18±0.03 a | 0.81±1.19 ab | 0.17±0.21 b | 0.77±0.27 ab |
| Listeriaceae | 0 b | 0 b | 2.89±0.35 a | 0 b |
| Leuconostocaceae | 0.04±0.02 b | 0 c | 3.75±0.33 a | 0.01±0.01 c |
| Streptococcaceae | 1.03±0.31 b | 0.06±0.04 c | 38.04±2.82 a | 0.29±0.02 c |
| Bacteroidetes | Flavobacteriaceae | 22.35±1.60 a | 24.25±2.97 a | 8.70±1.15 b | 9.60±1.05 b |
| Cyclobacteriaceae | 9.53±0.64 a | 10.15±0.84 a | 3.45±0.9 c | 5.26±1.23 b |
| Actinobacteria | Nocardioidaceae | 1.99±0.34 b | 0.39±0.07 c | 0.17±0.06 d | 5.22±0.51 a |
