# Supplementary material for: Biases during DNA extraction affect characterization of the microbiota associated with larvae of the Pacific white shrimp, Litopenaeus vannamei
Source: PeerJ. 2018 Jul 16;6:e5257. doi: 10.7717/peerj.5257 (PMC6052851; doi:10.7717/peerj.5257)
Supplement: Supplemental Information 3 — BaN5, BaZ2, BaM1, and BaP1 indicate microbial DNA extracted from larval samples of N5, Z2, M1, and P1 with the Ba kit, respectively; Numbers 1, 2, and 3 indicate technical replicates of each kit. This is similar for the St kit. [file peerj-06-5257-s003.xlsx]

## Sheet: dominant OTU
OTUid	Taxonomy	BaN5_1	BaN5_2	BaN5_3	StN5_1	StN5_2	StN5_3	BaZ2_1	BaZ2_2	BaZ2_3	StZ2_1	StZ2_2	StZ2_3	BaM1_1	BaM1_2	BaM1_3	StM1_1	StM1_2	StM1_3	BaP1_1	BaP1_2	BaP1_3	StP1_1	StP1_2	StP1_3
OTU59	Actinobacteria; Actinobacteria_c; Micrococcales; Micrococcaceae; Rothia	0	0	0	0	0	0	0	0	0.0605061	0	0	0.0275028	0.0110011	0	0	0	0.00550055	0.00550055	2.67877	1.90319	2.26073	0	0.00550055	0
OTU12	Actinobacteria; Actinobacteria_c; Propionibacteriales; Nocardioidaceae; Nocardioides	1.22112	1.0121	1.21012	1.40814	1.0066	1.29813	1.87019	1.79868	2.45325	0.154015	0.159516	0.225523	0.407041	0.049505	0.555556	0.0660066	0.115512	0.0220022	0.0605061	0.0605061	0.0275028	0	0.00550055	0.00550055
OTU4	Bacteroidetes; Cytophagia; Cytophagales; Cyclobacteriaceae; Algoriphagus	0.313531	0.390539	0.379538	0.214521	0.269527	0.220022	9.15292	8.88339	9.87899	4.23542	3.21232	2.76128	4.57096	4.41694	3.63036	2.86579	2.84928	2.47525	0.115512	0.0770077	0.19802	0.0275028	0.0275028	0.0550055
OTU22	Bacteroidetes; Cytophagia; Cytophagales; Cytophagaceae; unclassified Genus	3.59186	3.78988	3.64136	2.71177	3.41584	2.67877	0.0220022	0.0330033	0.00550055	0.0165017	0.00550055	0	0	0	0	0	0	0	0.0550055	0.0165017	0.00550055	0	0.00550055	0
OTU27	Bacteroidetes; Flavobacteria; Flavobacteriales; Crocinitomicaceae; unclassified Genus	0	0.00550055	0	0	0	0	0	0	0	0.00550055	0	0	1.06711	1.28713	1.0011	0.69857	0.572057	0.539054	0.10451	0.143014	0.19802	0.0770077	0.0715072	0.0275028
OTU26	Bacteroidetes; Flavobacteria; Flavobacteriales; Flavobacteriaceae; Myroides	0	0	0	0.00550055	0.0110011	0.00550055	0	0	0	1.45765	1.69967	1.50165	0	0	0	0.940594	0.874587	1.10011	0	0	0	0.638064	0.775578	0.753575
OTU25	Bacteroidetes; Flavobacteria; Flavobacteriales; Flavobacteriaceae; Tenacibaculum	0	0.0165017	0.0330033	0.0110011	0.0330033	0.0165017	0.0275028	0.0880088	0.220022	0.0605061	0.0605061	0.0605061	1.54565	1.24862	1.60066	0.69857	0.577558	0.456546	0.220022	0.0990099	0.341034	0.0165017	0.0385039	0.049505
OTU20	Bacteroidetes; Flavobacteria; Flavobacteriales; unclassified Family	0	0.00550055	0	0.00550055	0	0	0.187019	0.121012	0.154015	0.0330033	0.0385039	0.0165017	1.51265	1.06711	1.73267	0.814081	0.731573	0.379538	0.0110011	0.049505	0.0550055	0.00550055	0	0.00550055
OTU44	Bacteroidetes; Sphingobacteriia; Saprospirales; Saprospiraceae; unclassified Genus	1.94169	2.26623	1.85919	0.720572	0.847085	0.715072	0.0550055	0	0.0275028	0	0	0	0.0715072	0	0.0330033	0.0220022	0.0275028	0	0	0.00550055	0	0	0	0
OTU57	Bacteroidetes; Sphingobacteriia; Sphingobacteriales; Sphingobacteriaceae; Sphingobacterium	0	0	0	0	0	0	0	0	0	0	0	0	0	0	0	0	0	0	2.0132	1.30363	1.52915	0.627063	0.572057	0.654565
OTU1	Bacteroidetes;Flavobacteria;Flavobacteriales;Flavobacteriaceae; unclassified Genus	0.264026	0.291529	0.324532	0.346535	0.368537	0.10451	21.3146	20.1375	22.1782	7.61826	5.83608	5.11001	26.1881	28.7129	28.0803	16.7602	17.3652	14.527	10.7811	10.352	9.81848	2.18372	2.45325	2.43124
OTU45	Firmicutes; Bacilli; Bacillales; Bacillaceae; Bacillus	0	0	0.00550055	0	0	0	0.968097	0.9956	1.12211	0	0.0330033	0.0220022	0.0880088	0	0.049505	0	0	0	0	0	0	0	0	0
OTU54	Firmicutes; Bacilli; Bacillales; Exiguobacteriaceae; Exiguobacterium	0	0	0	0.00550055	0	0	0.412541	0.126513	0.0220022	0	0.0330033	0	0.115512	0	0.0220022	0.00550055	0	0.0165017	1.80968	1.56766	1.62266	0.00550055	0	0.00550055
OTU17	Firmicutes; Bacilli; Bacillales; Listeriaceae; Brochothrix	0	0	0	0.0275028	0.0165017	0.0220022	0.00550055	0	0	2.73377	3.13531	3.21782	0	0	0	1.60066	1.40814	1.37514	0	0	0	2.12871	2.36524	2.53025
OTU18	Firmicutes; Bacilli; Lactobacillales; Leuconostocaceae; Leuconostoc	0	0	0	0.0385039	0.0605061	0.0220022	0	0	0	3.32783	3.35534	3.9549	0	0	0	2.0407	1.9802	1.80418	0	0	0	2.81628	3.16832	3.30033
OTU5	Firmicutes; Bacilli; Lactobacillales; Streptococcaceae; Lactococcus	0	0.00550055	0	0.407041	0.59956	0.357536	0.0165017	0.0605061	0.0110011	31.3091	33.1793	35.3465	0.0220022	0	0.0110011	17.6898	16.2376	19.6755	0	0.00550055	0.00550055	40.8691	42.8548	43.6139
OTU1326	Firmicutes; Bacilli; Lactobacillales; Streptococcaceae; Lactococcus	0	0.0110011	0	0.0440044	0.0825083	0.0275028	0.286029	0.423542	0.280528	2.91529	3.10231	3.56436	0	0.0220022	0.0715072	2.0077	2.0407	2.41474	0	0	0	2.33223	3.47085	2.72827
OTU30	Proteobacteria; Alphaproteobacteria; Rhizobiales; Devosia_f; Maritalea	0.220022	0.247525	0.30253	0.231023	0.390539	0.214521	0.132013	0.40154	0.20352	0.0330033	0	0.0330033	0.605061	0.577558	0.69857	0.49505	0.451045	0.291529	1.30363	1.84268	1.66117	0.341034	0.269527	0.39604
OTU3	Proteobacteria; Alphaproteobacteria; Rhodobacterales; Rhodobacteraceae; Donghicola	4.09241	4.09241	4.39494	4.76348	4.48845	4.39494	10.9516	13.3718	14.912	5.94609	5.12651	4.19142	0.572057	0.841584	1.0176	0.709571	0.550055	0.478548	3.52585	2.49725	2.82178	1.16612	0.968097	0.973597
OTU1258	Proteobacteria; Alphaproteobacteria; Rhodobacterales; Rhodobacteraceae; Loktanella	5.33003	5.61606	5.60506	7.84928	6.65567	6.63916	2.0297	1.61716	1.65017	0.577558	0.357536	0.429043	0.50055	0.319032	0.20352	0.264026	0.231023	0.269527	0.59956	0.594059	0.506051	0.214521	0.214521	0.176018
OTU10	Proteobacteria; Alphaproteobacteria; Rhodobacterales; Rhodobacteraceae; Ruegeria	3.10781	2.76128	3.14081	4.21892	3.85039	4.29593	4.59296	5.15402	4.45545	2.13971	1.74367	1.58416	0.0715072	0.0935094	0.10451	0.148515	0.0660066	0.0825083	0.154015	0.214521	0.110011	0.176018	0.0880088	0.049505
OTU189	Proteobacteria; Alphaproteobacteria; Rhodobacterales; Rhodobacteraceae; Sulfitobacter	1.61716	1.57316	1.74367	2.34873	2.26623	1.94169	0.0880088	0.280528	0.242024	0.0165017	0.049505	0.0385039	1.0341	0.979098	1.34213	0.528053	0.456546	0.484048	0.313531	0.390539	0.473047	0.126513	0.148515	0.143014
OTU2	Proteobacteria; Alphaproteobacteria; Rhodobacterales; Rhodobacteraceae; Nautella/Aliiroseovarius	49.824	50.3355	47.5523	45.4455	45.176	48.1903	15.7756	14.1694	11.9527	3.86139	2.73927	3.27283	2.51375	2.36524	2.71727	1.47415	1.51815	1.56216	5.26953	5.34103	5.70957	2.22772	1.78218	1.69967
OTU6	Proteobacteria; Alphaproteobacteria; Rhodobacterales; Rhodobacteraceae; unclassified Genus	0	0	0.0110011	0	0.00550055	0.00550055	0.00550055	0.0275028	0.0385039	0.00550055	0.0825083	0.0330033	13.2123	11.9417	12.5853	9.58746	9.70297	8.71837	11.1661	12.4752	12.2662	6.16612	5.09901	4.24642
OTU972	Proteobacteria; Alphaproteobacteria; Rhodobacterales; Rhodobacteraceae; unclassified Genus	0	0	0.0110011	0.00550055	0	0.00550055	0.00550055	0	0	0	0.00550055	0.00550055	4.44444	4.29593	4.78548	2.83828	3.08031	2.9538	17.4972	16.1991	16.4191	7.15072	5.50055	5.55006
OTU544	Proteobacteria; Alphaproteobacteria; Rhodobacterales; Rhodobacteraceae; unclassified Genus	12.4807	11.6337	11.5842	11.4026	11.6392	12.1507	2.44774	2.0352	2.26623	0.885589	0.665567	0.506051	1.51815	1.23762	1.55666	0.522552	0.49505	0.484048	0.319032	0.313531	0.528053	0.110011	0.154015	0.0440044
OTU7	Proteobacteria; Alphaproteobacteria; Rhodobacterales; Rhodobacteraceae; unclassified Genus	0.918592	0.632563	0.808581	0.814081	1.12211	0.869087	0.0880088	0.187019	0.132013	0.110011	0.0605061	0.10451	11.6942	9.0429	10.6491	7.71177	7.54125	7.0077	4.52695	6.40264	5.64906	2.43674	1.94719	2.07371
OTU9	Proteobacteria; Alphaproteobacteria; Rhodobacterales; Rhodobacteraceae; unclassified Genus	3.28383	3.25633	3.64136	4.20242	4.26293	4.19692	9.26843	8.12981	8.16832	3.69087	2.87679	3.0473	2.29923	2.26623	2.85479	1.55116	1.82618	2.0462	0.671067	0.39604	0.429043	0.258526	0.209021	0.253025
OTU986	Proteobacteria; Alphaproteobacteria; Rhodobacterales; Rhodobacteraceae; unclassified Genus	4.07041	3.88339	4.47195	4.80748	5.37404	4.39494	1.9912	2.45875	2.30473	0.709571	0.555556	0.555556	1.21562	2.18922	1.55666	0.69857	0.638064	0.511551	1.59516	1.42464	1.18262	0.423542	0.30253	0.319032
OTU47	Proteobacteria; Alphaproteobacteria; Rhodobacterales; Rhodobacteraceae; unclassified Genus	1.83168	1.71617	1.92519	2.21672	1.94719	1.9582	1.47965	1.69417	1.42464	0.456546	0.368537	0.423542	1.19912	1.06711	1.06711	0.841584	0.693069	0.792079	1.0396	0.858086	0.852585	0.379538	0.308031	0.29703
OTU24	Proteobacteria; Alphaproteobacteria; Sphingomonadales; Erythrobacteraceae; Erythrobacter	0.137514	0.214521	0.176018	0.264026	0.225523	0.192519	0.451045	0.990099	0.990099	0.363036	0.286029	0.214521	0.280528	0.418042	0.583058	0.39604	0.368537	0.407041	0	0.0220022	0.0110011	0.00550055	0.0220022	0.00550055
OTU35	Proteobacteria; Betaproteobacteria; Burkholderiales; Oxalobacteraceae; Janthinobacterium	0	0	0	0.0165017	0.0275028	0.0110011	0.00550055	0.00550055	0.0165017	1.12761	1.31463	1.12761	0	0	0	0.522552	0.687569	0.70407	0	0	0.0385039	0.467547	0.434543	0.423542
OTU40	Proteobacteria; Deltaproteobacteria;; Bdellovibrionales; Bacteriovoracaceae; Peredibacter	0	0	0	0	0	0	0	0	0	0	0.00550055	0	0.852585	1.25413	1.15512	0.528053	0.341034	0.324532	0	0	0	0	0	0
OTU11	Proteobacteria; Gammaproteobacteria; Alteromonadales; Alteromonadaceae; Alteromonas	1.07811	1.22662	1.11661	0.654565	0.709571	0.676568	1.21562	1.30913	1.22112	0.423542	0.242024	0.390539	5.63806	6.13861	5.41254	3.55336	3.9769	2.68427	0.0935094	0.187019	0.0990099	0.0660066	0.0220022	0.00550055
OTU14	Proteobacteria; Gammaproteobacteria; Alteromonadales; Pseudoalteromonadaceae; Pseudoalteromonas	0.0165017	0.0220022	0.0220022	0.00550055	0.00550055	0.0165017	0.627063	0.588559	0.49505	0.154015	0.126513	0.0330033	4.05941	5.41804	4.31793	1.72167	1.87019	1.29813	0.555556	0.808581	0.577558	0.137514	0.0385039	0.10451
OTU32	Proteobacteria; Gammaproteobacteria; Enterobacterales; Yersiniaceae; Serratia	0	0	0	0.0220022	0.0275028	0.0110011	0.0385039	0.0110011	0	2.41474	2.46975	2.74477	0.0110011	0	0	1.83718	1.30363	1.78218	0.0165017	0.0330033	0	0.583058	0.69857	0.682068
OTU36	Proteobacteria; Gammaproteobacteria; Methylococcales; Methylophaga_f; Methylophaga	1.30913	1.36414	1.84268	1.75468	1.74917	1.45215	0.214521	0.308031	0.258526	0.10451	0.0605061	0.0330033	0.242024	0.176018	0.143014	0.132013	0.143014	0.0440044	0	0	0	0	0	0
OTU58	Proteobacteria; Gammaproteobacteria; Oceanospirillales; Halomonadaceae; Halomonas	0	0	0	0	0	0	0	0.00550055	0	0	0.0990099	0	0.649065	0.192519	0.19802	0.165017	0.0825083	0.258526	1.68867	1.87019	1.82068	0.819582	0.533553	0.770077
OTU28	Proteobacteria; Gammaproteobacteria; Pseudomonadales; Moraxellaceae; Acinetobacter	0.00550055	0	0	0.0165017	0.0330033	0.0165017	0.555556	0.473047	0.324532	2.23322	2.39274	2.25523	0.330033	0.341034	0.385039	1.43564	1.40264	1.45215	1.9747	2.15622	2.83278	1.83718	1.51815	1.89219
OTU13	Proteobacteria; Gammaproteobacteria; Pseudomonadales; Moraxellaceae; Acinetobacter	0.00550055	0.00550055	0	0.00550055	0	0	1.18812	1.16612	1.06161	0.511551	0.30253	0.374037	0.0275028	0.40154	0.0440044	0.159516	0.192519	0.236524	1.27063	1.46315	0.836084	0.379538	0.275028	0.484048
OTU23	Proteobacteria; Gammaproteobacteria; Pseudomonadales; Moraxellaceae; Moraxella	0	0	0	0.0660066	0.0660066	0.049505	0	0	0	3.19032	3.52035	3.32233	0	0	0	1.76018	1.64466	2.54125	0	0	0	2.10121	2.43674	2.54675
OTU16	Proteobacteria; Gammaproteobacteria; Pseudomonadales; Moraxellaceae; unclassified Genus	0	0	0.0110011	0.0660066	0.0550055	0.0220022	0.00550055	0.0330033	0	3.09681	3.61386	4.0319	0	0	0	1.74367	2.26073	2.0407	9.62596	6.41364	8.12981	5.88559	5.9626	5.9901
OTU34	Proteobacteria; Gammaproteobacteria; Pseudomonadales; Pseudomonadaceae; Pseudomonas	0	0.00550055	0	0	0.0110011	0.00550055	0.0385039	0.187019	0.148515	0.539054	0.473047	0.594059	0.121012	0.236524	0.214521	0.412541	0.379538	0.511551	4.71947	4.0484	4.956	2.91529	2.21122	2.31023
OTU978	Proteobacteria; Gammaproteobacteria; Pseudomonadales; Pseudomonadaceae; Pseudomonas	0	0	0	0.0330033	0.0440044	0.0110011	0.126513	0.214521	0.10451	2.45875	2.70077	3.09681	0.407041	0.308031	0.374037	1.49065	1.52915	1.67767	0.159516	0.19802	0.231023	1.56766	2.09021	1.75468
OTU19	Proteobacteria; Gammaproteobacteria; unclassified Order	0.143014	0.0715072	0.132013	0.137514	0.115512	0.0990099	0.90209	1.05611	1.21562	0.478548	0.214521	0.258526	0.429043	0.649065	1.07811	0.561056	0.357536	0.379538	0	0.0110011	0	0	0	0
OTU21	Proteobacteria; Gammaproteobacteria; Vibrionales; Vibrionaceae; Vibrio	0.0165017	0.0550055	0.0550055	0.0220022	0.0385039	0	0.19802	0.390539	0.0605061	0.0110011	0.0385039	0.0330033	1.74917	1.41914	1.27613	0.643564	0.561056	0.660066	0.159516	0.0990099	0.0165017	0.0220022	0.0385039	0.0165017
